# Supplementary material
Source: HighWire-hosted journal article supplement (https://cmaj.ca/highwire/filestream/57869/field_highwire_adjunct_files/0/meta-ley-appendix_1.pdf)
Supplement: meta-ley-appendix_1.pdf [file meta-ley-appendix_1.pdf]

**Appendix 1:** Metabolic syndrome at baseline among the Sandy Lake Health and Diabetes Project participants, according to incident type 2 diabetes at 10-year follow-up

| Metabolic syndrome                               | No diabetes,<br>no. (%) | Incident diabetes,<br>no. (%) | <i>p</i> value* |
|--------------------------------------------------|-------------------------|-------------------------------|-----------------|
| NCEP ATP III original definition, yes            | 47 (11.6)               | 22 (25.6)                     | < 0.001         |
| NCEP definition using FPG $\geq$ 5.6 mmol/L, yes | 77 (19.1)               | 33 (38.4)                     | < 0.001         |
| IDF definition, yes†                             | 102 (25.3)              | 41 (47.7)                     | < 0.001         |

Note: FPG = fasting plasma glucose; IDF = International Diabetes Federation; NCEP ATP III = National Cholesterol Education Program Adult Treatment Panel III.

\*Chi-square test performed.

†Age-specific cutoffs used.
